# Supplementary material
Source: MDPI journal article supplement (https://www.mdpi.com/2079-9276/10/12/120)
Supplement: s1 [file s1]

## Lead Mining Properties in relation to Baseline Water Stress

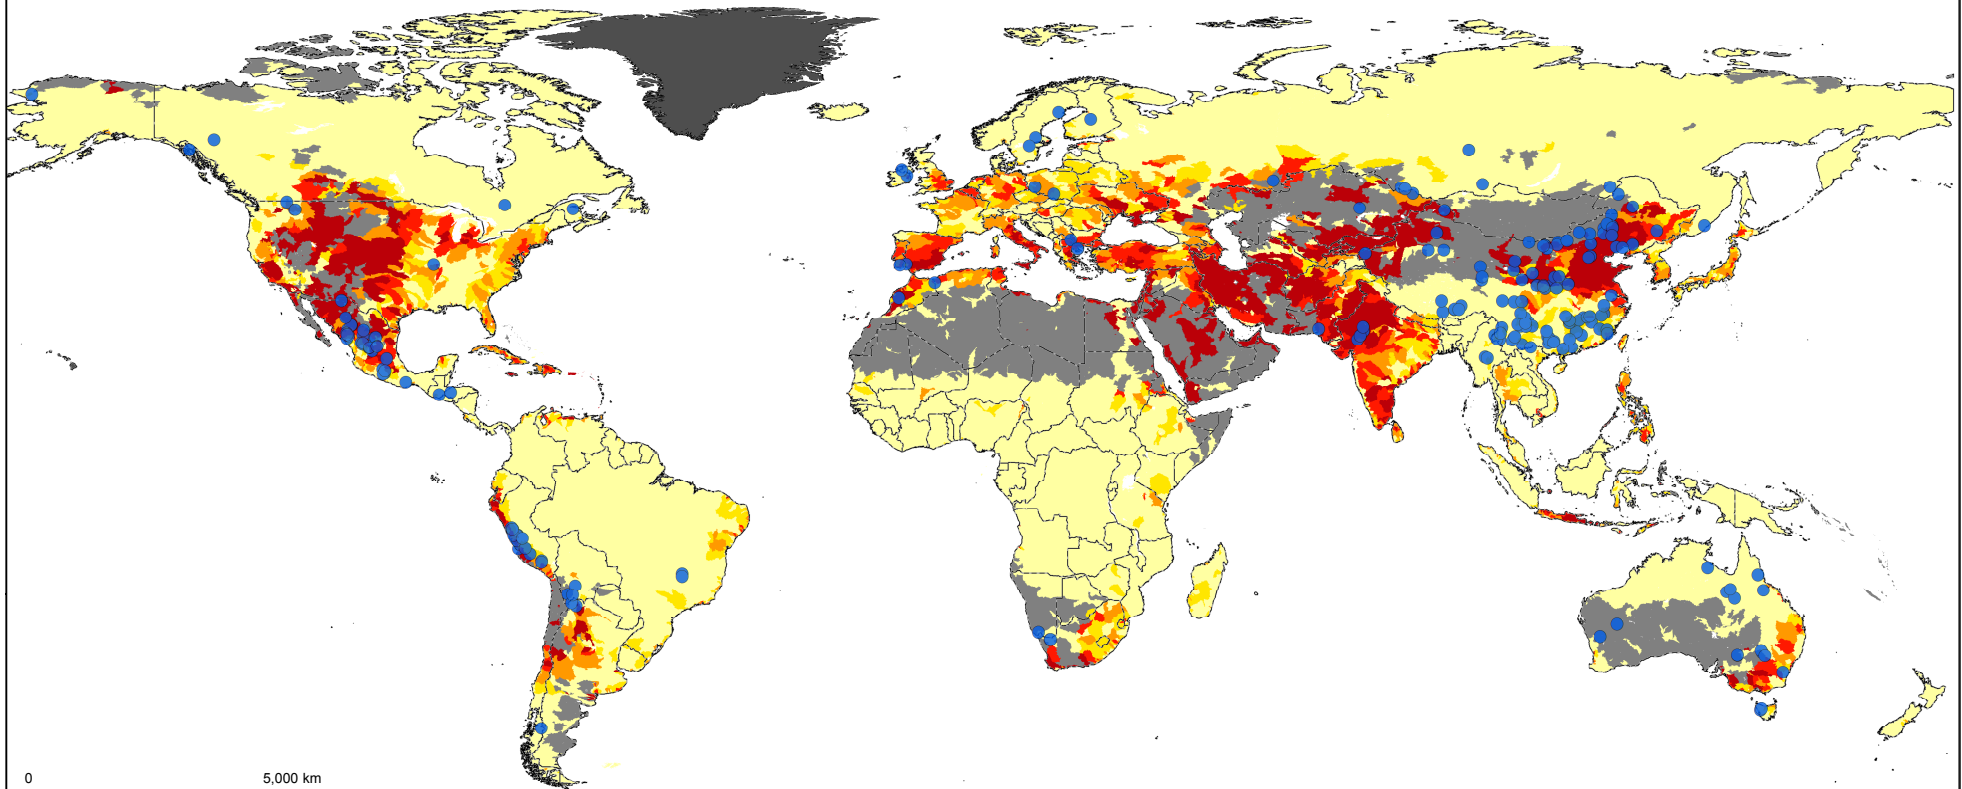

### Locations of Mining Properties in 2018

● Lead

### Baseline Water Stress on Subbasin Level

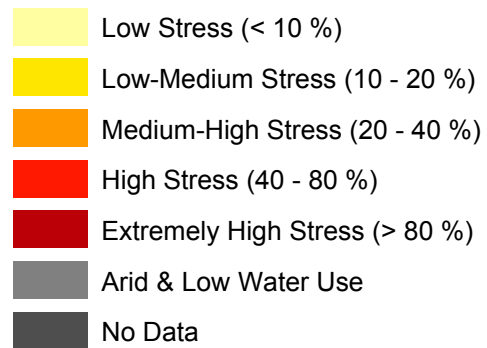

### Boundary Lines and Symbols

International Boundaries

### Data sources:

- Production data and coordinates obtained from SNL Metals & Mining Database (2019)
- Baseline water stress sourced from Gassert et al. (2014)
- Cartography and design by Meißner (2021)
