# Supplementary material
Source: MDPI journal article supplement (https://www.mdpi.com/2079-9276/10/12/120)
Supplement: s1 [file s1]

# MAY

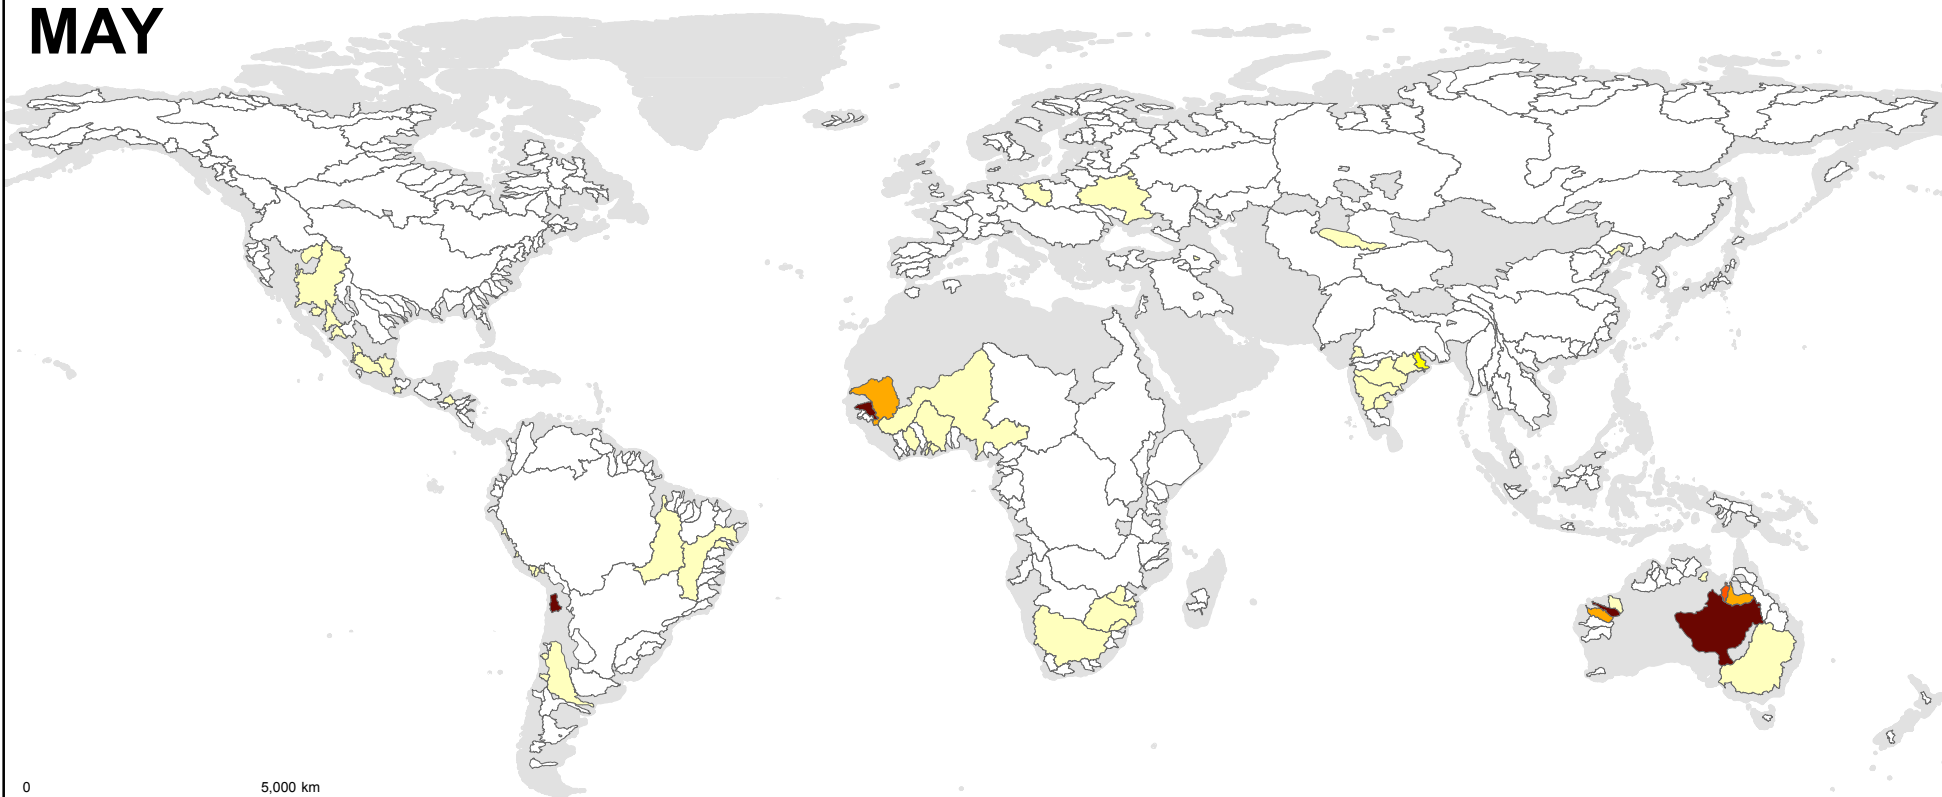

## Total Water Stress as a Result of Mining with respect to Environmental Water Requirements (EWR)

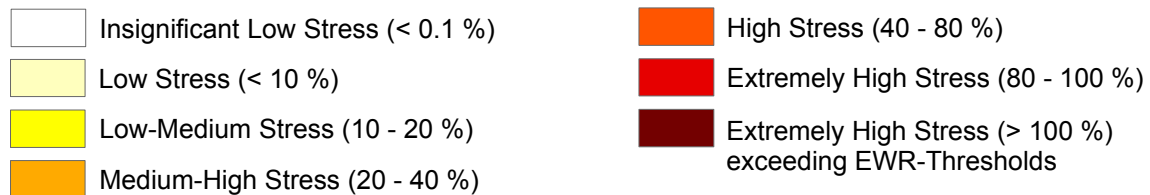

## Boundary Lines and Symbols

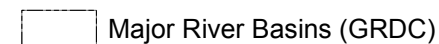

### Data sources:

- GRDC-Basins obtained from GRDC (2007)
- Cartography and design by Meißner (2021)
