# Supplementary material
Source: MDPI journal article supplement (https://www.mdpi.com/2079-9276/10/12/120)
Supplement: s1 [file s1]

## Manganese Mining Properties in relation to Baseline Water Stress

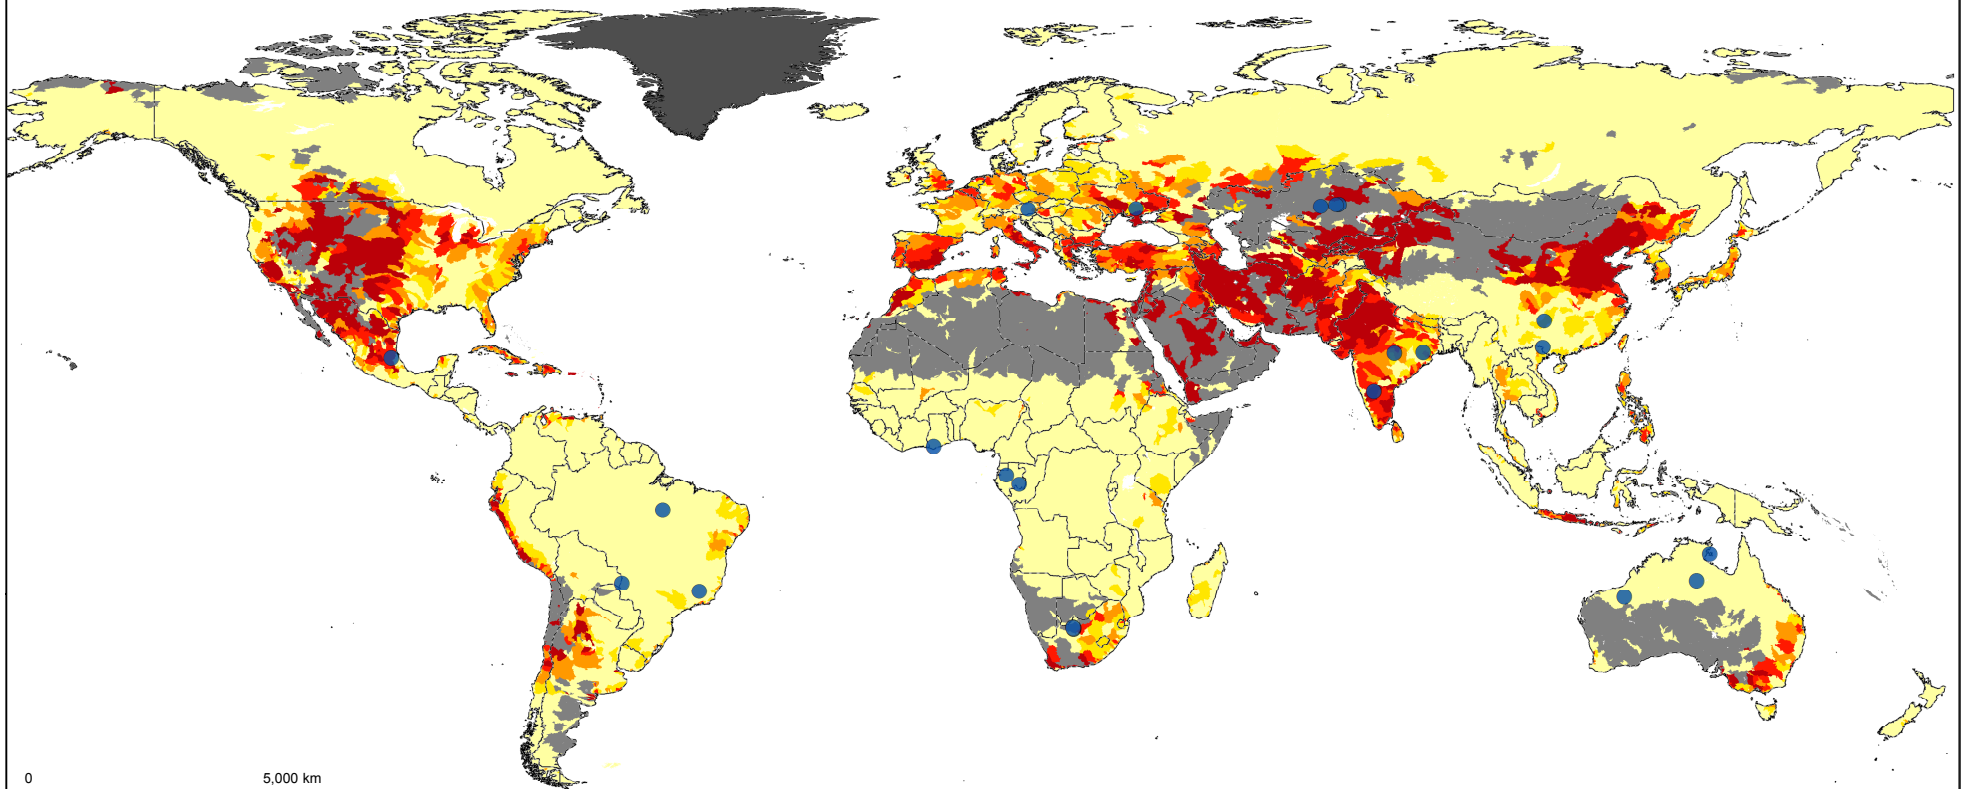

### Locations of Mining Properties in 2018

- Manganese

### Baseline Water Stress on Subbasin Level

- Low Stress (< 10 %)
- Low-Medium Stress (10 - 20 %)
- Medium-High Stress (20 - 40 %)
- High Stress (40 - 80 %)
- Extremely High Stress (> 80 %)
- Arid & Low Water Use
- No Data

### Boundary Lines and Symbols

- International Boundaries

### Data sources:

- Production data and coordinates obtained from SNL Metals & Mining Database (2019)
- Baseline water stress sourced from Gassert et al. (2014)
- Cartography and design by Meißner (2021)
